# Supplementary material
Source: Springer Nature journal article supplement (https://www.springermedizin.de/resource/supplementary/12885_2012_3757_MOESM5_ESM.pdf/9464330)

Median overall survival (months)

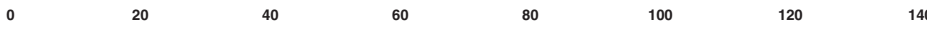

RCTs comparing **Thalidomide** based regimes

Stewart et al. [53] (arm no Thal, n = 166)

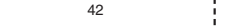

Spencer et al. [54] (arm no Thal, n = 129)

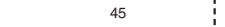

Morgan et al. [55] (arm no Thal, n = 410)

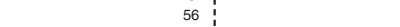

Lokhorst et al. [56] (arm no Thal, n = 268)

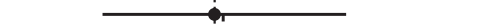

Stewart et al. [53] (arm Thal, n = 166)

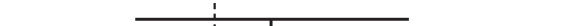

Morgan et al. [55] (arm Thal, n = 408)

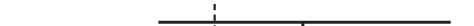

Spencer et al. [54] (arm Thal, n = 114)

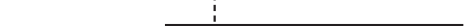

Lokhorst et al. [56] (arm Thal, n = 268)

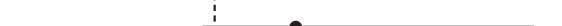

RCTs comparing **Bortezomib** based regimes

Sonneveld et al. [57] (arm no Bort, n = 162)

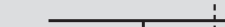

Sonneveld et al. [57] (arm Bort, n = 168)

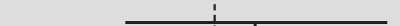

RCTs comparing **Lenalidomide** based regimes

McCarthy et al. [58] (arm no Len, n = 229)

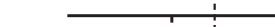

Attal et al. [59] (arm no Len, n = 307)

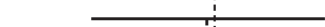

Attal et al. [59] (arm Len, n = 307)

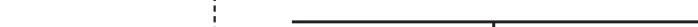

McCarthy et al. [58] (arm Len, n = 231)

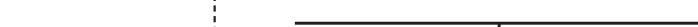

Supplement: MOESM5 [file 9464330]
